# Supplementary material for: Activation of the Anaphase Promoting Complex Restores Impaired Mitotic Progression and Chemosensitivity in Multiple Drug-Resistant Human Breast Cancer
Source: MDPI journal article supplement (doi:10.3390/cancers16091755), 2024-04-30

# Supplemental Figure S1

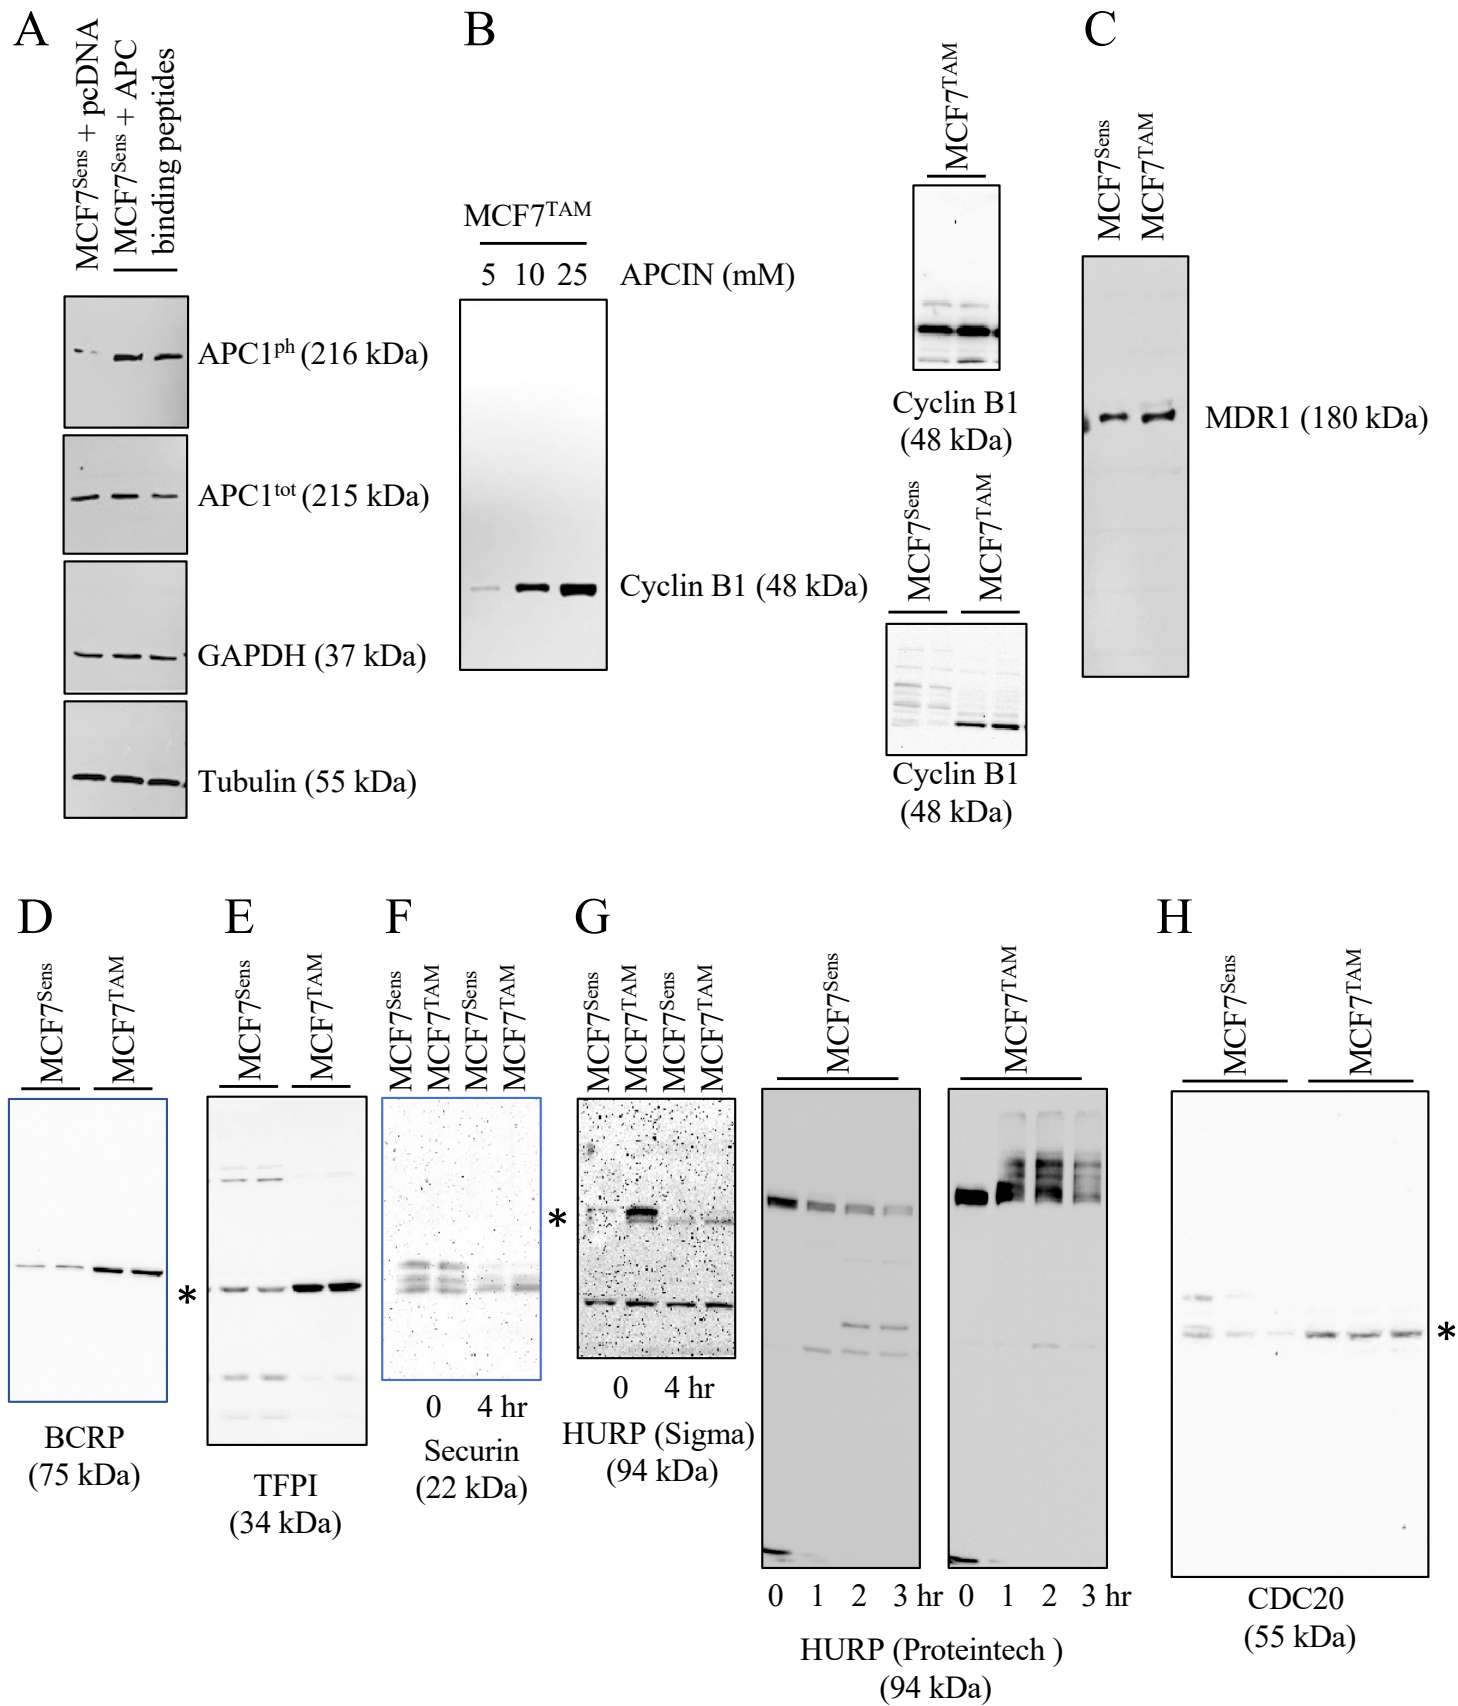

I

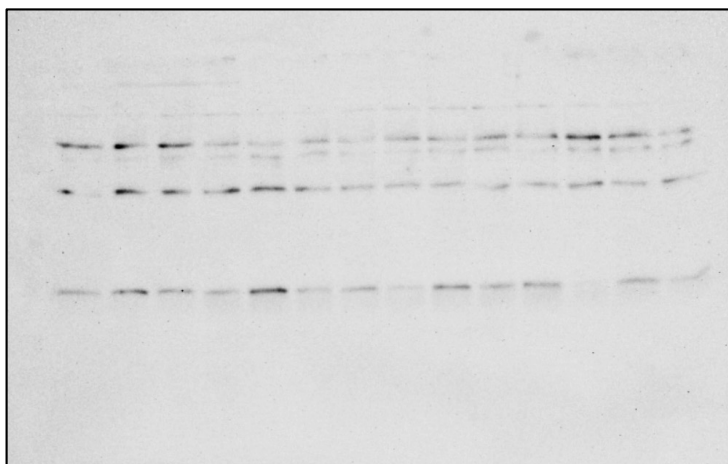

H3<sup>Ser10phos</sup> (15 kDa)

J

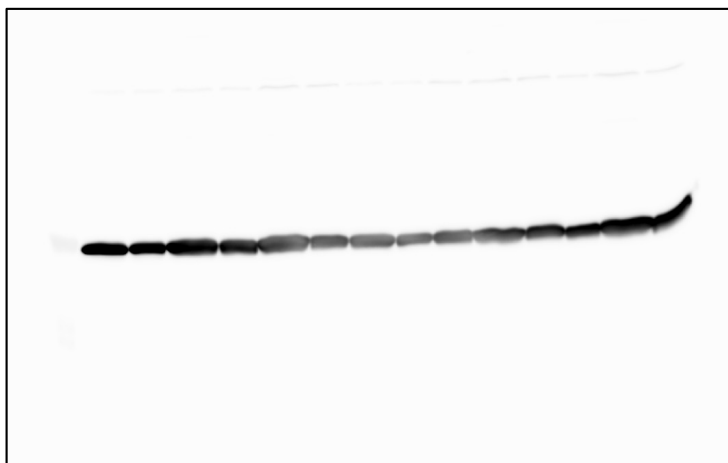

H3<sup>tot</sup> (15 kDa)

Supplemental Figure S2

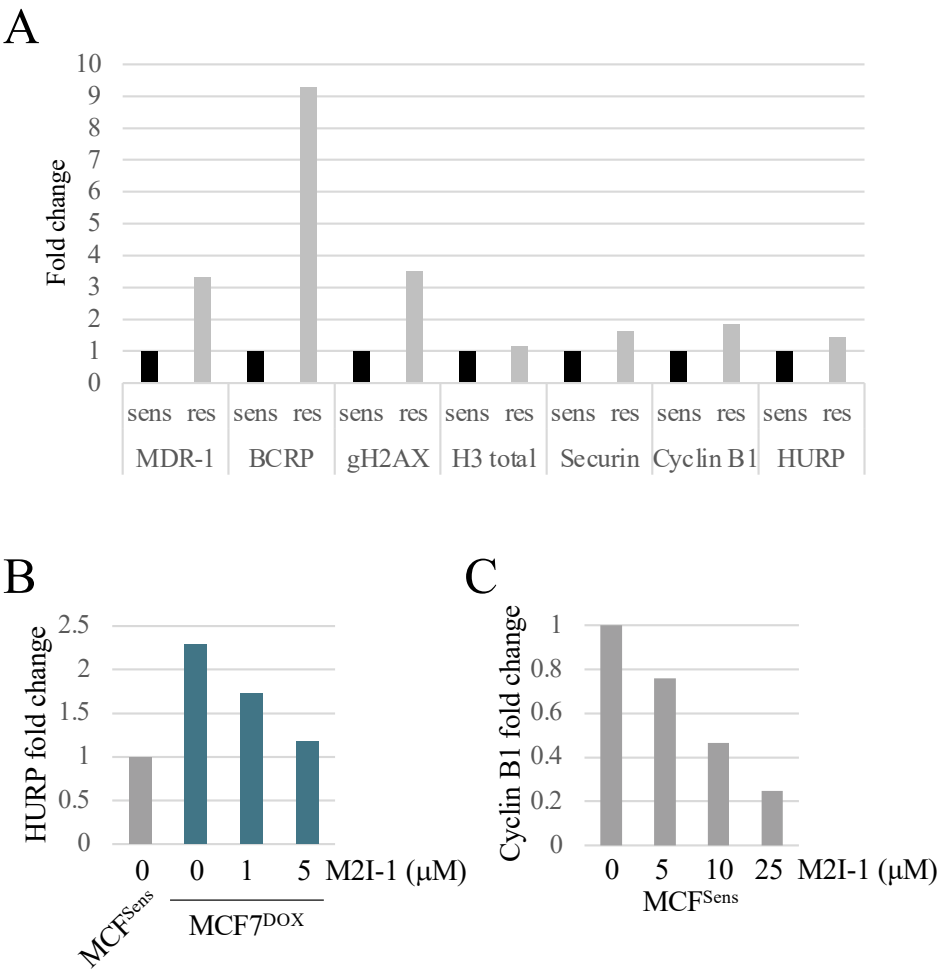

Supplemental Figure S3

A

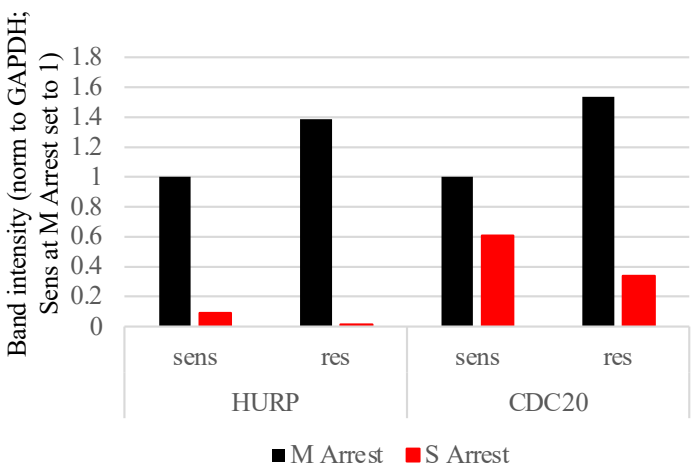

B

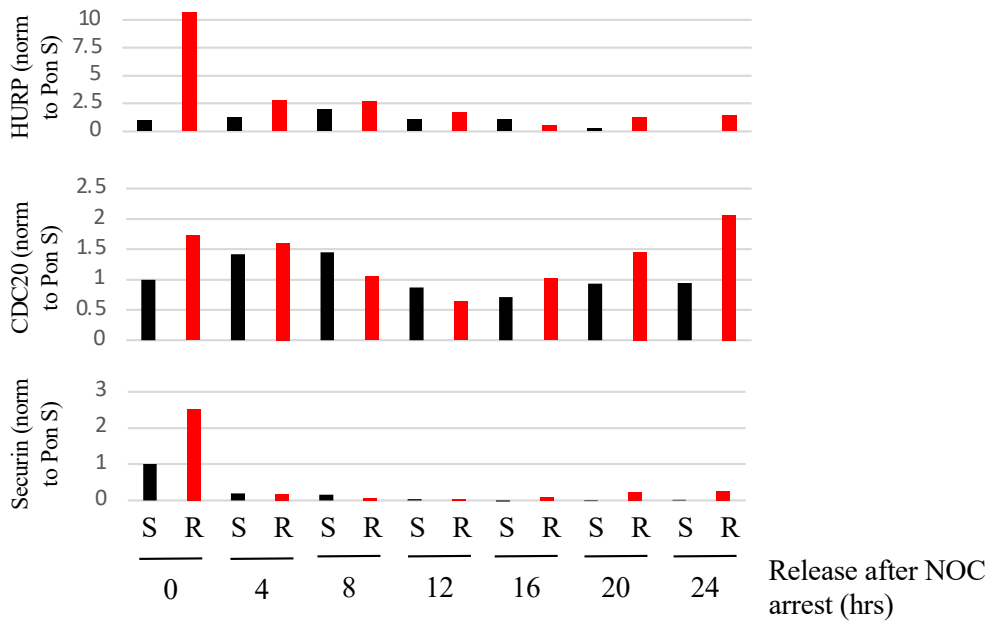

C

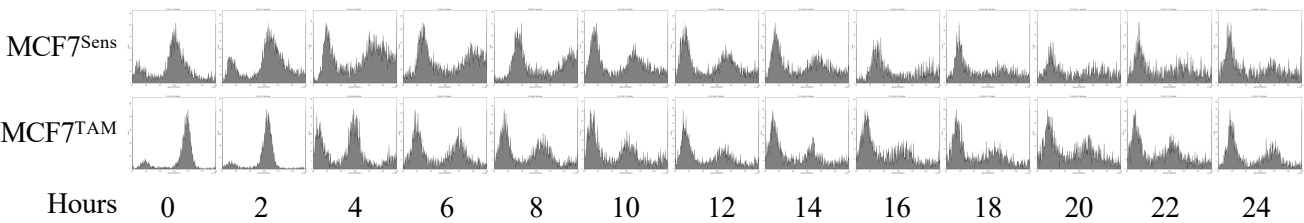

Supplemental Figure S4

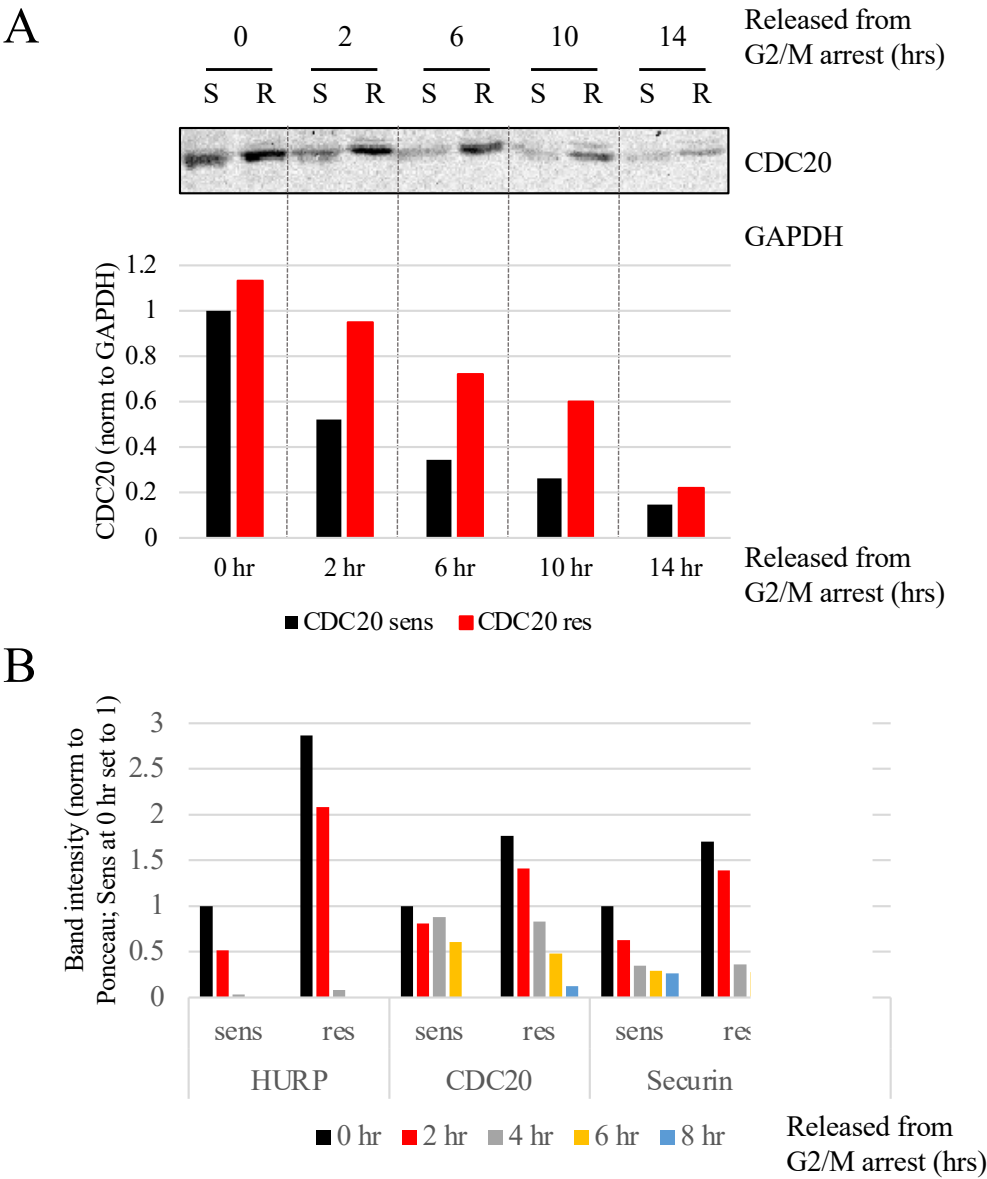

Supplemental Figure S5

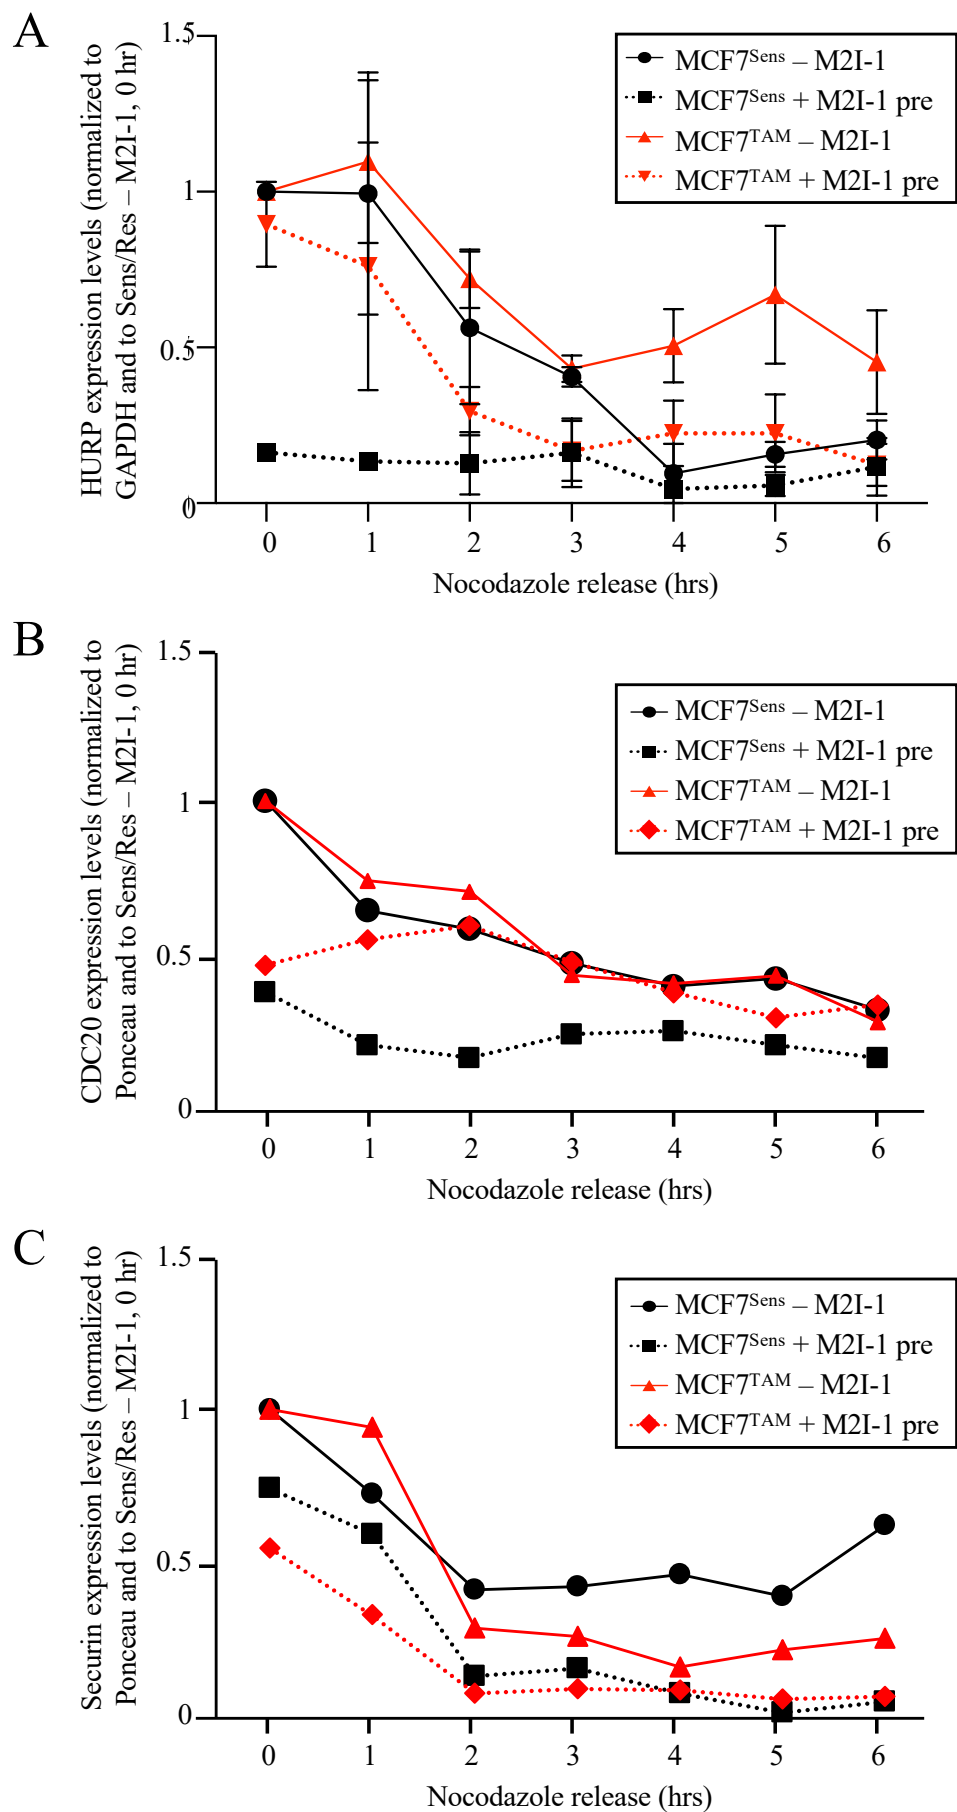

Supplement: s1 [file s1]
